# Supplementary material
Source: ML conference proceedings conference paper supplement (https://proceedings.mlr.press/v115/kuck20a.html)
Supplement: Supplementary file 1 [file kuck20a-supp.pdf]

## 7 Appendix

### 7.1 Proof of Proposition 1

*Proof.* Suppose Algorithm 1 outputs “ $|S| \geq s \lfloor 2^{j-3} \rfloor$ ” but  $|S| < s \lfloor 2^{j-3} \rfloor$ . We will show that this happens with probability at most  $\Delta$ . Let the iteration with  $m = i$  be the final iteration where a break would have resulted in a correct output, i.e.,  $i = \arg \max_{i'} s \lfloor 2^{i'-3} \rfloor \leq |S|$ . This means that  $s \lfloor 2^{i-3} \rfloor \leq |S| < s \lfloor 2^{i-2} \rfloor$ . Also note that  $i \geq 2$  because of the floor operator. The algorithm outputs an incorrect bound if and only if the while-loop on  $m$  breaks with  $m = j$  such that  $j \geq i + 1$ . For this to happen, the while loop would *not* have been broken in all iterations with  $m \leq i$ . In particular, we would have observed  $\sum_{t=1}^T w^t \geq sT/2$  on iteration  $i$ . However, this is an unlikely event, as we now show. Observe that  $S(h^i) = S \cap (h^i)^{-1}(b)$  by definition, and

$$\mathbf{E}[|S(h^i)|] = \frac{|S|}{2^i} < \frac{s \lfloor 2^{i-2} \rfloor}{2^i} \leq \frac{s}{4}.$$

This results in the inequalities

$$\begin{aligned} \mathbf{E}[w^t] &= \mathbf{E}[\min\{s, |S(h^i)|\}] \\ &\leq \min\{\mathbf{E}[s], \mathbf{E}[|S(h^i)|]\} \leq s/4. \end{aligned} \quad (2)$$

Since  $w^t \in [0, s]$ , we can apply Hoeffding’s inequality and use Equation 2 to obtain

$$\begin{aligned} \Pr\left[\frac{1}{T} \sum_{t=1}^T w^t \geq \frac{s}{2}\right] &\leq \exp\left(-\frac{2T}{s^2} \left(\frac{s}{2} - \frac{s}{4}\right)^2\right) \\ &= \exp\left(-\frac{T}{8}\right). \end{aligned}$$

Setting  $T = \lceil 8 \ln \frac{1}{\Delta} \rceil$ , we have  $\exp\left(-\frac{T}{8}\right) \leq \Delta$ . Therefore, the probability of observing  $\sum_{t=1}^T w^t \geq sT/2$  in iteration  $i$  (making the output of Algorithm 1 incorrect) is bounded above by  $\Delta$ .  $\square$

### 7.2 Proof of Proposition 2

*Proof.* Suppose Algorithm 2 outputs “ $|S| \geq s \lfloor 2^{j-3} \rfloor$ ” but  $|S| < s \lfloor 2^{j-3} \rfloor$ . We will show that this happens with probability at most  $\Delta$ . Let the iteration with  $m = i$  be the final iteration where a break would have resulted in a correct output, i.e.,  $i = \arg \max_{i'} s \lfloor 2^{i'-3} \rfloor \leq |S|$ . This means that  $s \lfloor 2^{i-3} \rfloor \leq |S| < s \lfloor 2^{i-2} \rfloor$ . Also note that  $i \geq 2$  because of the floor operator.

The algorithm outputs an incorrect bound if and only if the while-loop on  $m$  breaks with  $m = j$  such that  $j \geq i + 1$ . For this to happen, the while loop would *not* have been broken in all iterations with  $m \leq i$ . In particular, we would have observed  $\sum_{t=1}^T w^t \geq sT/2$  on iteration

$i$ . However, this is an unlikely event, as we now show. Observe that  $S(h^i) = S \cap (h^i)^{-1}(b)$  by definition, and

$$\mathbf{E}[|S(h^i)|] = \frac{|S|}{2^i} < \frac{s \lfloor 2^{i-2} \rfloor}{2^i} \leq \frac{s}{4}.$$

This property holds because  $b$  is chosen uniformly at random on line 8 of Algorithm 2. Crucially, this property holds regardless of how the matrices  $A_m$  are constructed on line 7.

This results in the inequalities

$$\begin{aligned} \mathbf{E}[w_k] &= \mathbf{E}[\min\{sK, |S(h^{j-1})|\}] \leq s/4 \\ \mathbf{E}\left[\frac{1}{K} \sum_{k=1}^K w_k\right] &\leq s/4 \\ \mathbf{E}[w^t] &= \mathbf{E}\left[\min\left\{s, \frac{1}{K} \sum_{k=1}^K w_k\right\}\right] \leq s/4 \end{aligned} \quad (3)$$

Since  $w^t \in [0, s]$ , we can apply Hoeffding’s inequality and use Equation 3 to obtain

$$\begin{aligned} \Pr\left[\frac{1}{T} \sum_{t=1}^T w^t \geq \frac{s}{2}\right] &\leq \exp\left(-\frac{2T}{s^2} \left(\frac{s}{2} - \frac{s}{4}\right)^2\right) \\ &= \exp\left(-\frac{T}{8}\right). \end{aligned}$$

Setting  $T = \lceil 8 \ln \frac{1}{\Delta} \rceil$ , we have  $\exp\left(-\frac{T}{8}\right) \leq \Delta$ . Therefore, the probability of observing  $\sum_{t=1}^T w^t \geq sT/2$  in iteration  $i$  (making the output of Algorithm 1 incorrect) is bounded above by  $\Delta$ .  $\square$

### 7.3 Upper Bound

*Proof.* Suppose Algorithm 4 outputs “ $|S| \leq s2^{j+1}$ ”, but this is incorrect, and  $s2^{j+2} \geq |S| > s2^{j+1}$ . That is, the output is the largest invalid upper bound. We will show that Algorithm 1 outputs this, or any other smaller invalid bound, with probability at most  $\Delta$ . For the algorithm to output the smallest valid upper bound,  $2^{j+2}$ , the iteration with  $m = j + 2$  would have resulted in breaking the while-loop on  $m$ . Thus, in *every* prior iteration  $i \leq j + 1$ , we would have observed  $\sum_{t=1}^T w^t \geq sT/2$ . We will use the union bound to upper bound the probability of observing  $\sum_{t=1}^T w^t < sT/2$  for *some*  $i \leq j + 1$ .

Fix any  $i \leq j + 1$ . Then,  $\mathbf{E}[|S(h^i)|] = \mu_i = |S|/2^i = 2^{j-i} |S|/2^j > s2^{j-i+1}$  by our assumption. Let the variance be  $\mathbf{Var}[|S(h^i)|] = \sigma_i^2$ . We first observe that the min operation with  $sK$  on line 10 of Algorithm 1 serves only an optimization purpose, and does not alter the outcome of the algorithm (because of the subsequent min operation when computing  $w^t$ ). Thus, for the sake of

analysis, we can let  $w_k = |S(h^i)|$  without loss of generality.

For brevity of notation, let  $\bar{w}_K = \frac{1}{K} \sum_{k=1}^K w_k$ . Then,  $\mathbf{E}[\bar{w}_K] = \mathbf{E}[|S(h^i)|] > s2^{j-i+1}$  and  $\mathbf{Var}[\bar{w}_K] \leq \sigma_i^2/K$ . Applying Cantelli's inequality:

$$\begin{aligned} \Pr[\bar{w}_K \leq s] &= \Pr[\bar{w}_K \leq \mathbf{E}[\bar{w}_K] - (\mathbf{E}[\bar{w}_K] - s)] \\ &\leq \frac{\sigma_i^2/K}{\sigma_i^2/K + s^2(2^{j-i+1} - 1)^2} \\ &\leq \frac{\sigma_i^2/K}{\sigma_i^2/K + s^2 4^{j-i}} \end{aligned}$$

Hence,  $\Pr[\bar{w}_K \geq s] \geq \frac{s^2 4^{j-i}}{\sigma_i^2/K + s^2 4^{j-i}}$ . Since  $w^t = \min\{s, \bar{w}_K\}$ , we also have  $\Pr[w^t \geq s] \geq \frac{s^2 4^{j-i}}{\sigma_i^2/K + s^2 4^{j-i}}$ .

Let  $y^t$  denote a 0-1 indicator variable that is 1 when  $w^t \geq s$ . Then  $y^t \leq w^t$  and  $\mathbf{E}[y^t] \geq \frac{s^2 4^{j-i}}{\sigma_i^2/K + s^2 4^{j-i}}$ . By a precondition of the theorem,  $s^2 4^{j-i} \geq \mu_i^2/16 > \sigma_i^2/K$ , which implies  $\mathbf{E}[y^t] > 1/2$ , making it unlikely to observe the sum of  $T_i$  such  $y^t$  variables to be smaller than  $T_i/2$ . We thus have:

$$\begin{aligned} \Pr\left[\sum_{t=1}^{T_i} w^t < \frac{sT_i}{2}\right] &\leq \Pr\left[\sum_{t=1}^{T_i} y^t < \frac{T_i}{2}\right] \\ &\leq \exp\left(-\frac{2}{T_i} \left(\mathbf{E}\left[\sum_{t=1}^{T_i} y^t\right] - \frac{T_i}{2}\right)^2\right) \\ &\leq \exp\left(-\frac{2}{T_i} \left(\frac{s^2 4^{j-i} T_i}{\sigma_i^2/K + s^2 4^{j-i}} - \frac{T_i}{2}\right)^2\right) \\ &= \exp\left(-\frac{T_i}{2} \left(\frac{s^2 4^{j-i} - \sigma_i^2/K}{s^2 4^{j-i} + \sigma_i^2/K}\right)^2\right) \\ &\leq \exp\left(-\frac{T_i}{2} \left(\frac{\mu_i^2/16 - \sigma_i^2/K}{\mu_i^2/16 + \sigma_i^2/K}\right)^2\right) \\ &= \exp\left(-\frac{T_i}{2} \left(\frac{1 - 16\gamma_i^2/K}{1 + 16\gamma_i^2/K}\right)^2\right), \end{aligned}$$

where the second inequality follows from Hoeffding's inequality and the last inequality follows because  $s^2 4^{j-i} \geq \mu_i^2/16$ . This expression is at most  $\Delta/n$  because  $T_i$  is set to  $\left[2 \left(\frac{1+16\gamma_i^2/K}{1-16\gamma_i^2/K}\right)^2 \ln \frac{n}{\Delta}\right]$  in line 4 of Algorithm 4. Applying the union bound over all  $i \leq j+1$ , the probability of observing  $\sum_{t=1}^{T_i} w^t < sT_i/2$  in any iteration  $i \leq j+1$ , and thus possibly outputting an incorrect upper bound, is bounded above by  $\Delta$ .  $\square$

When the linear search in Algorithm 4 is replaced with more efficient search procedures, the definition of  $T_i$  can be modified to achieve the desired probability of correctness.

---

#### Algorithm 4 Upper Bound with Variance Reduction

**Inputs:**  $K$ : Number of repetitions per trial

$s$ : Solution cutoff

$\Delta$ : Failure probability

$\mathcal{O}_S$ : A SAT oracle

$\{\mathcal{A}^m\}_{m=1}^n$ : For each  $m \in [1, n]$ , a distribution over parity matrices with known variance bounds that satisfy  $16\sigma_m^2 < K\mu_m^2$ , where  $\mathbf{Var}[|S(h^m)|] \leq \sigma_m^2$  and  $\mu_m = \mathbf{E}[|S(h^m)|]$

**Output:** A probabilistic upper bound on  $|S|$

---

```

1:  $m = 1$ 
2: while  $m \leq n$  do
3:    $\gamma_m^2 = \sigma_m^2/\mu_m^2$ 
4:    $T_m = \left\lceil 2 \left(\frac{1+16\gamma_m^2/K}{1-16\gamma_m^2/K}\right)^2 \ln \frac{n}{\Delta} \right\rceil$ 
5:   for  $t = 1, \dots, T$  do
6:     for  $k = 1, \dots, K$  do
7:       Sample  $A^m \sim \mathcal{A}^m$ , denote  $h^m(x) = A^m x$ 
8:       Sample  $b \sim \text{Uniform}(\mathbb{F}_2^m)$ 
9:        $w_k \leftarrow \min\{sK, |S \cap (h^m)^{-1}(b)|\}$  { Invoke oracle  $\mathcal{O}_S$  up to  $sK$  times to check whether the input formula with additional constraints  $A^m x = b$  has at least  $sK$  distinct solutions}
10:     $w^t \leftarrow \min\left\{s, \frac{1}{K} \sum_{k=1}^K w_k\right\}$ 
11:    if  $\sum_{t=1}^T w^t < sT/2$  then
12:      break
13:     $m = m + 1$ 
14: Output " $|S| \leq s2^{m+1}$ "

```

---
